# Supplementary figures and images for: Haploid Mammalian Genetic Screen Identifies UBXD8 as a Key Determinant of HMGCR Degradation and Cholesterol Biosynthesis
Source: PubMed Central journal article supplement — Arterioscler Thromb Vasc Biol. 2017 Oct 25;37(11):2064–74. doi: 10.1161/ATVBAHA.117.310002 (PMC5671778; doi:10.1161/atvbaha.117.310002), 2017-10-25

**+UBXD8**

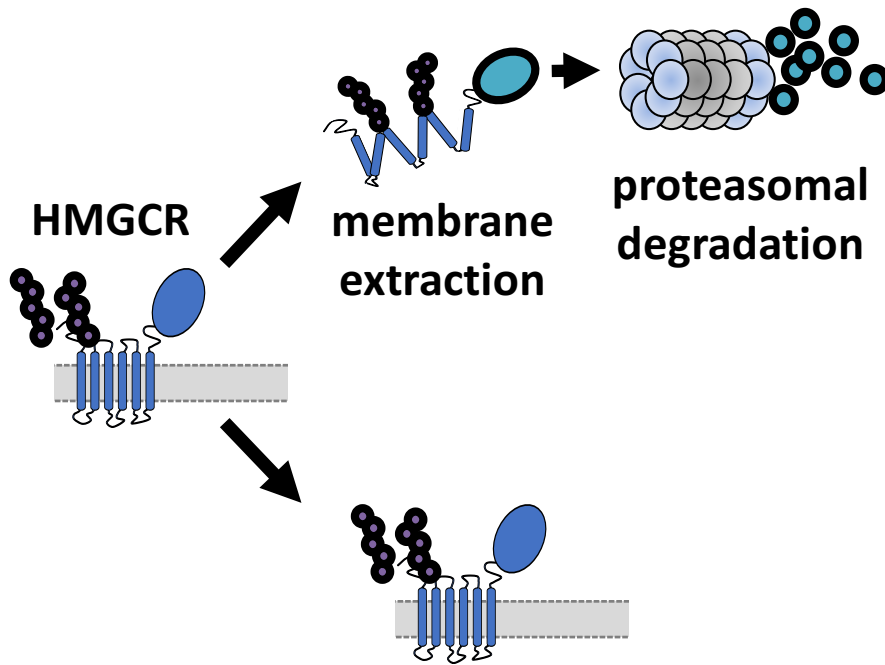

**-UBXD8**

Supplement: atv-37-2064-s007.pdf [file atv-37-2064-s007.pdf]
